# Supplementary material
Source: PubMed Central journal article supplement (PMC275582)
Supplement: nar_31_22_e145__1.pdf [file nar_31_22_e145__1.pdf]

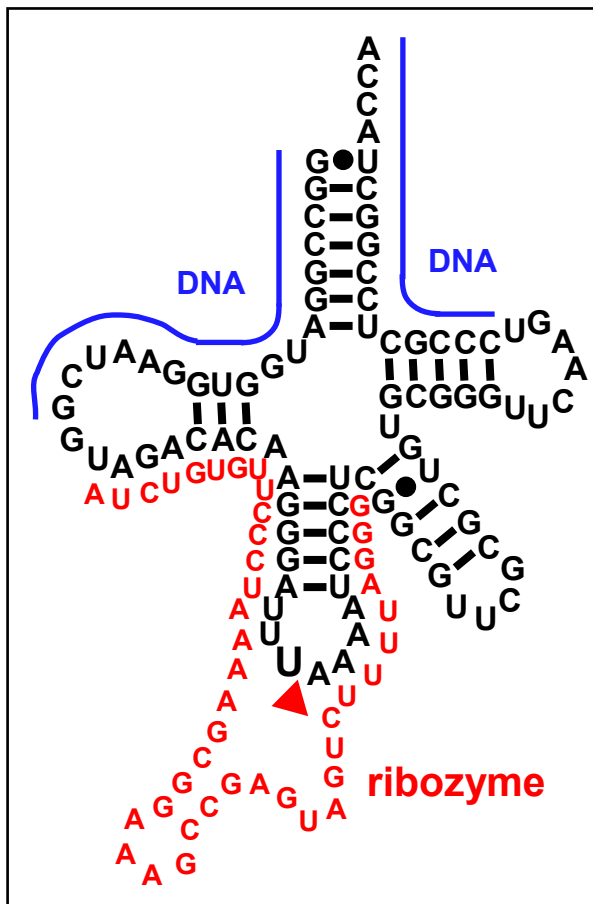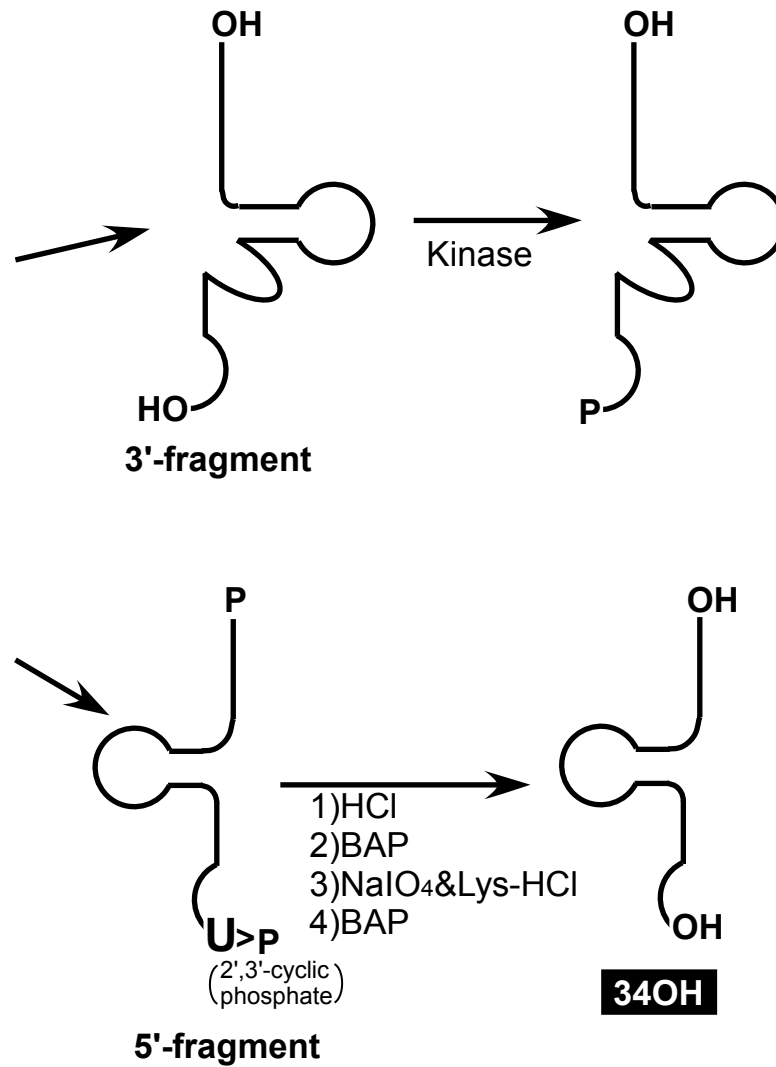

## Supplementary Materials

**Figure S1.** Preparation of the 5'- and 3'-half fragments of the tRNA<sup>Leu</sup><sub>UAA</sub>. The tRNA transcript was cut in half by the hammerhead ribozyme (shown in red) which cleaves specifically between U34 and A35, as shown by the red triangle. The two synthetic DNAs shown in blue solid lines (whose sequences are shown in Materials and Methods), each of which is complimentary to the 5' and 3' end of the tRNA, respectively, are used for unfolding of the tRNA so as to be accessible for the ribozyme. The 5'- and 3'-half fragments obtained by this step were subjected to the process described in the Materials and Methods.
